# Supplementary material for: A photochromic dual-functional Mg-CP exhibits white-emission after modification with CuI
Source: Royal Society of Chemistry journal article supplement (doi:10.1039/c6tc00244g), 2016-01-01
Supplement: c6tc00244g1.pdf [file c6tc00244g1.pdf]

Electronic Supporting Information (ESI) for

**A dual-functional Mg-CP exhibits white-emitting after modification  
with CuI and photochromic behavior**

Zhao-Feng Wu,<sup>a,b</sup> Bin Tan,<sup>c</sup> Zai-Lai Xie,<sup>c</sup> Jing-Jing Fu<sup>a</sup> and Xiao-Ying Huang<sup>\*,a</sup>

<sup>a</sup> State Key Laboratory of Structural Chemistry, Fujian Institute of Research on the Structure of Matter, The Chinese Academy of Sciences, Fuzhou, Fujian 350002, P.R. China

<sup>b</sup> University of the Chinese Academy of Sciences, Beijing 100049, P.R. China.

<sup>c</sup> College of Chemistry, Fuzhou University, Fuzhou, Fujian 350002, P.R. China

## 1. More structural details

Single-crystal X-ray diffraction data of **1** were collected on a Xcalibur E Oxford diffractometer with graphite monochromated MoK $\alpha$  radiation ( $\lambda = 0.71073 \text{ \AA}$ ) at 293 K. The absorption correction was applied using a multi-scan technique. The structure was solved by direct method and refined by full-matrix least-squares on  $F^2$  using the SHELX-97 program.<sup>1</sup> Non-hydrogen atoms were refined with anisotropic displacement parameters. The hydrogen atoms bonded to C atoms were positioned with idealized geometry and those attached to O were located from difference-Fourier maps and their positions were refined with DFIX/DANG restraints. The empirical formula was confirmed by the elemental analysis. A summary of the crystal data and structural refinement details is given in Tables S1.

**Table S1** Summary of crystal data and structural refinement details for **1**.

|                          |                                                                                |
|--------------------------|--------------------------------------------------------------------------------|
| Empirical formula        | C <sub>34</sub> H <sub>32</sub> Mg <sub>2</sub> N <sub>2</sub> O <sub>14</sub> |
| Formula weight           | 741.24                                                                         |
| Crystal system           | monoclinic                                                                     |
| Space group              | <i>C2/c</i>                                                                    |
| <i>T</i> /K              | 293(2)                                                                         |
| $\lambda$ / $\text{\AA}$ | 0.71073                                                                        |

|                                   |                |
|-----------------------------------|----------------|
| $a/\text{Å}$                      | 16.469(2)      |
| $b/\text{Å}$                      | 15.5386(12)    |
| $c/\text{Å}$                      | 14.540(3)      |
| $\beta/^\circ$                    | 117.500(19)    |
| $V/\text{Å}^3$                    | 3300.4(8)      |
| $Z$                               | 4              |
| $D_c/\text{Mg}\cdot\text{m}^{-3}$ | 1.492          |
| $\mu/\text{mm}^{-1}$              | 0.150          |
| $F(000)$                          | 1544           |
| Measured refls.                   | 6976           |
| Independent refls.                | 3578           |
| $R_{\text{int}}$                  | 0.0262         |
| No. of parameters                 | 255            |
| $GOF$                             | 1.017          |
| $^aR_1, wR_2 [I > 2\sigma(I)]$    | 0.0587, 0.1588 |
| $R_1, wR_2$ (all data)            | 0.0768, 0.1727 |

$$^aR_1 = \frac{\sum ||F_o| - |F_c||}{\sum |F_o|}, wR_2 = \left\{ \frac{\sum w[(F_o)^2 - (F_c)^2]^2}{\sum w[(F_o)^2]^2} \right\}^{1/2}$$

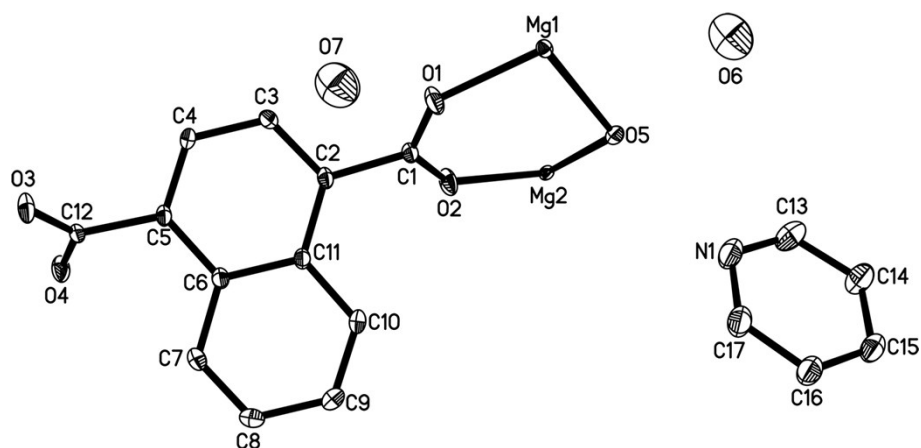

**Fig. S1** *Ortep* drawing of the crystallographically asymmetric unit of **1**. Hydrogen atoms are omitted for clarity.

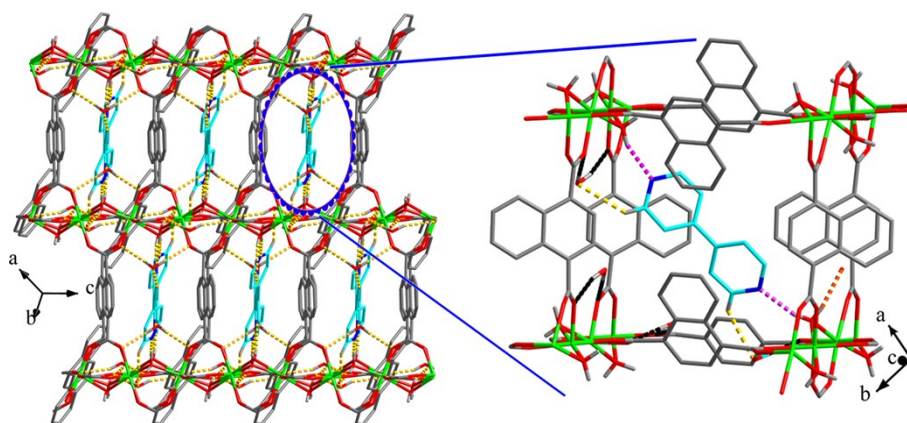

**Fig. S2** The hydrogen bonding acting as the inter-molecular interactions to stabilize the host-guest system in **1**.

**Table S2** Hydrogen bonds for compound **1**.

| D-H...A              | d(D-H) | d(H...A) | d(D...A) | <(DHA) |
|----------------------|--------|----------|----------|--------|
| O(5)-H(5A)··N(1)     | 0.859  | 2.00     | 2.816    | 160    |
| O(5)-H(5B)··O(6)     | 0.793  | 1.98     | 2.755    | 167    |
| O(7)-H(7A)··O(1)     | 0.905  | 2.00     | 2.905    | 179    |
| O(7)-H(7B)··O(3) #1  | 0.90   | 2.17     | 3.033    | 161    |
| C(17)-H(17)··O(7) #2 | 0.93   | 2.60     | 3.312    | 134    |

Symmetry transformations used to generate equivalent atoms: #1  $-x+3/2, -y+3/2, -z+2$ ; #2  $-x+1, y, -z+3/2$ .

**Table S3** Distances ( $d/\text{\AA}$ ) and angles ( $^\circ$ ) for the  $\pi$ - $\pi$  interactions in **1**.

| ring(1)··ring(2)                                                                                   | $d[\text{Cg}(1)\cdots\text{Cg}(2)]^b$ | $\alpha^c$ | $\beta^d$ | $\gamma^e$ | $d[\text{Cg}(1)\cdots\text{P}(2)]^f$ | $d[\text{Cg}(2)\cdots\text{P}(1)]^g$ |
|----------------------------------------------------------------------------------------------------|---------------------------------------|------------|-----------|------------|--------------------------------------|--------------------------------------|
| C(6)~C(11)··C(13) <sup>i</sup> ~C(17) <sup>i</sup> , N1 <sup>i</sup> ;<br>i: $1/2+x, 3/2-y, 1/2+z$ | 3.984(2)                              | 6.68(17)   | 19.4      | 19.8       | 3.7494(13)                           | 3.7585(15)                           |

<sup>a</sup> For a graphical depiction of distances and angles in the assessment of  $\pi$ - $\pi$  interactions, see Scheme 1. <sup>b</sup> Centroid–centroid distance. <sup>c</sup> Dihedral angle between the ring planes. <sup>d</sup> Angle between the centroid vector  $\text{Cg}(1)\cdots\text{Cg}(2)$  and the normal to the plane 2. <sup>e</sup> Angle between the centroid vector  $\text{Cg}(1)\cdots\text{Cg}(2)$  and the normal to the plane 1. <sup>f</sup> Perpendicular distance of  $\text{Cg}(1)$  on ring plane 2. <sup>g</sup> Perpendicular distance of  $\text{Cg}(2)$  on ring plane 1.

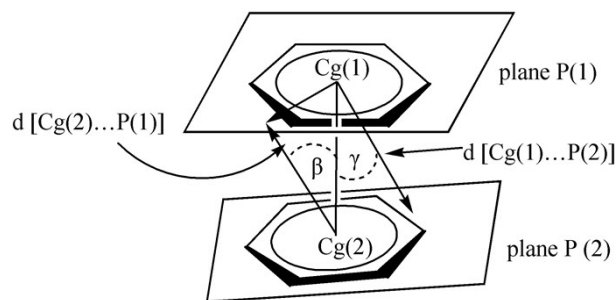

**Scheme S1** Graphical presentation of the parameters used in Table S3 for the description of  $\pi$ - $\pi$  stacking.

**Table S4** Distances ( $d/\text{\AA}$ ) and angles ( $^\circ$ ) for the C-H $\cdots\pi$  interactions in **1**.

| X-H $\cdots$ ring(3)                                                              | $d[\text{H}\cdots\text{Cg}(3)]$ | $d[\text{X}\cdots\text{Cg}(3)]$ | $^\circ[\text{X-H}\cdots\text{Cg}]$ |
|-----------------------------------------------------------------------------------|---------------------------------|---------------------------------|-------------------------------------|
| C(8)-H(8A) $\cdots$ C(13) <sup>ii</sup> -C(17) <sup>ii</sup> , N1 <sup>ii</sup> ; | 2.91                            | 3.541                           | 127                                 |
| ii: $1/2+x, 1/2+y, z$                                                             |                                 |                                 |                                     |

## 2. Materials and physical measurements

All chemicals were commercially purchased and used without further purification. Elemental analyses (EA) for C, H and N were performed on a German Elementary Vario EL III instrument. Energy dispersive spectroscopy (EDS) was obtained with a JEOL JSM-6700F scanning electron microscope. The UV-Vis spectra were measured at room temperature using a Perkin-Elmer Lambda 950 spectrometer, and a BaSO<sub>4</sub> plate was used as a standard (100% reflectance). The photochromic behavior was induced by irradiation with a Xe lamp (Beijing, 500 W). The absorption spectrum was calculated from reflectance spectrum by using the function:  $\alpha/S = (1-R^2)/2R^2$ , where  $\alpha$  is the absorption coefficient,  $S$  is the scattering coefficient, and  $R$  is the reflectance. Powder X-ray diffraction (PXRD) patterns were conducted in the angular range of  $2\theta = 5 - 65^\circ$  on a Miniflex II diffractometer using CuK $\alpha$  radiation. Electron spin resonance (ESR) signals were recorded with a Bruker A300 spectrometer. Inductively coupled plasma (ICP) analyses were performed with an Ultima 2 unit. X-ray photoelectron spectroscopy (XPS) measurements were performed using a ESCALAB 250Xi X-ray Photoelectron Spectrometer (XPS) Microprobe. Emission, excitation spectra and the photoluminescence life-time measurements of the compounds were recorded on a Edinburgh FLS980 fluorescence spectrometer at room temperature. The quantum yields ( $\Phi$ ) were recorded on an Edinburgh FLS920 fluorescence spectrometer at room temperature.

**Synthesis of compound 1.** A mixture of  $\text{Mg}(\text{NO}_3)_2 \cdot 6\text{H}_2\text{O}$  (0.256 g, 1 mmol), 1,4-NDCH<sub>2</sub> (0.216 g, 1 mmol), bpy (0.198 g, 1 mmol), NaOH (0.080 g, 2 mmol) in CH<sub>3</sub>OH (2 mL) and H<sub>2</sub>O (2 mL) was sealed in a 20 mL Teflon-lined stainless-steel autoclave at 373K for 2 days. Colorless block-like crystals of **1** (0.125 g, yield: 34% based on magnesium) were obtained. Anal. Calc. for **1**: C, 55.09%; H, 4.35%; N, 3.78%. Found: C, 55.31%; H, 4.16%; N, 3.77%.

**Synthesis of 1-CuI.** As-synthesized compound **1** (~75 mg, 0.2 mmol) was loaded into an agate mortar and manually ground with the pestle to afford a fine powder. After that it was immersed in 10 mL anhydrous acetonitrile with CuI (0.025 and 0.05 mmol, respectively) in a 20 mL glass bottle that was kept at 373K for about 24 h, to get complexes of **1-CuI** (1.87% and 3.15%), respectively.

**Preparation for the guest-exchangeable samples.** As-synthesized compound **1** (~100 mg) was immersed in 10 mL CH<sub>3</sub>OH or CH<sub>3</sub>CH<sub>2</sub>OH, and kept at 373K for about 5 days, to get the guest-exchanged compounds. The EA results for the CH<sub>3</sub>OH and CH<sub>3</sub>CH<sub>2</sub>OH-exchanged samples are C, 54.06/54.53%; H, 4.08/3.97% and C, 57.75/58.07%; H, 3.90/3.96%, respectively.

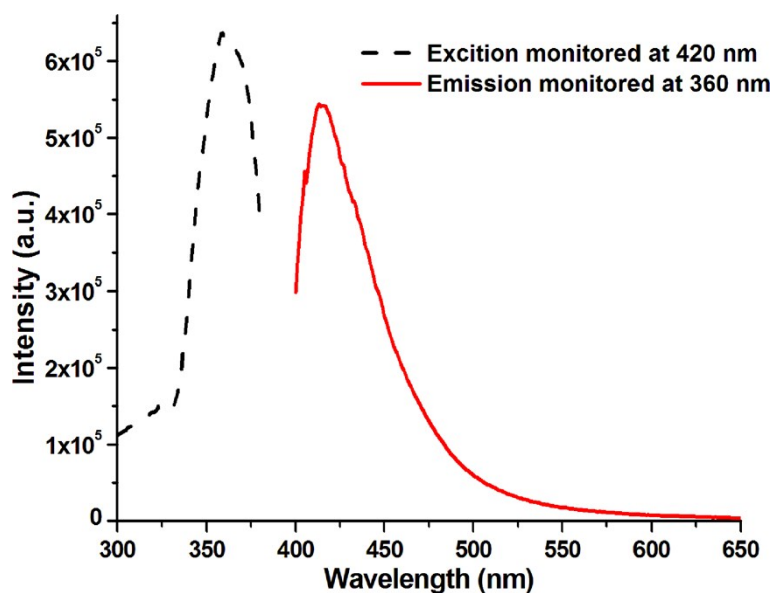

**Fig. S3** The excitation and emission spectra of compound **1** in the solid state at room temperature.

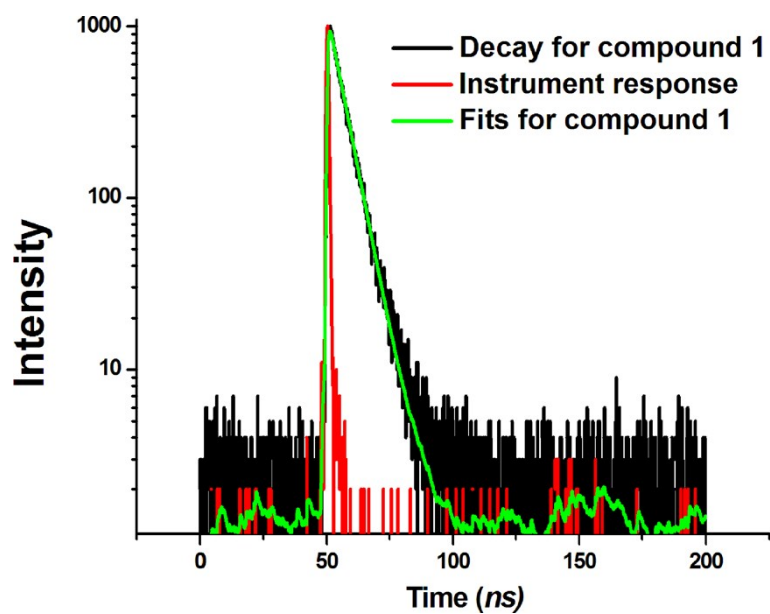

Fig. S4 The decay profile of compound 1.

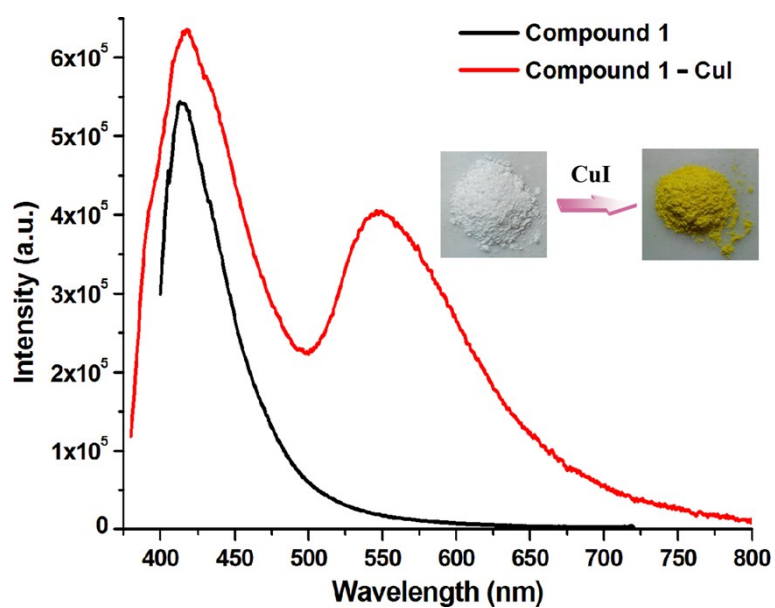

Fig. S5 Solid-state PL spectra of samples 1 and 1-CuI monitored at 360 nm; inset: photographs of samples 1 and 1-CuI.

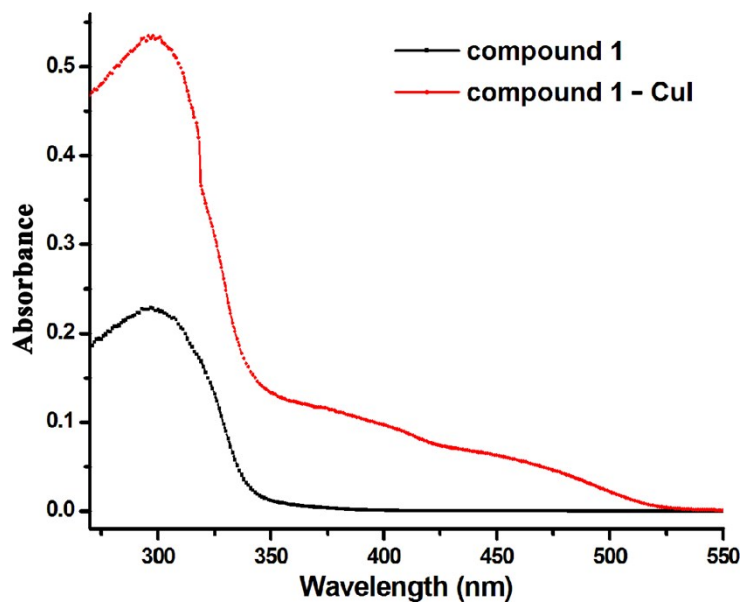

Fig. S6 Solid adsorption spectra of compounds 1 and 1-CuI.

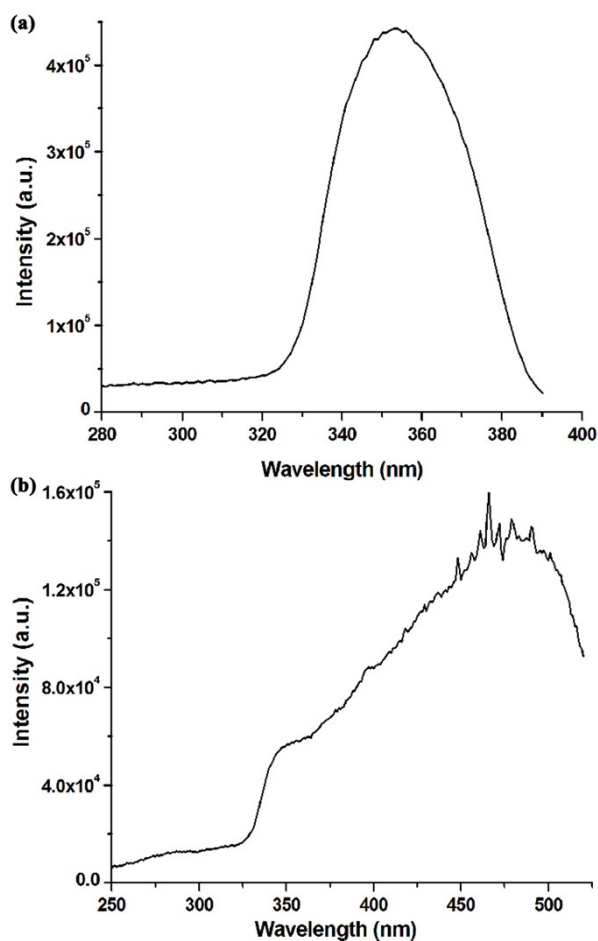

Fig. S7 Solid-state excitation spectra of 1-CuI monitored at 410 and 550 nm, respectively.

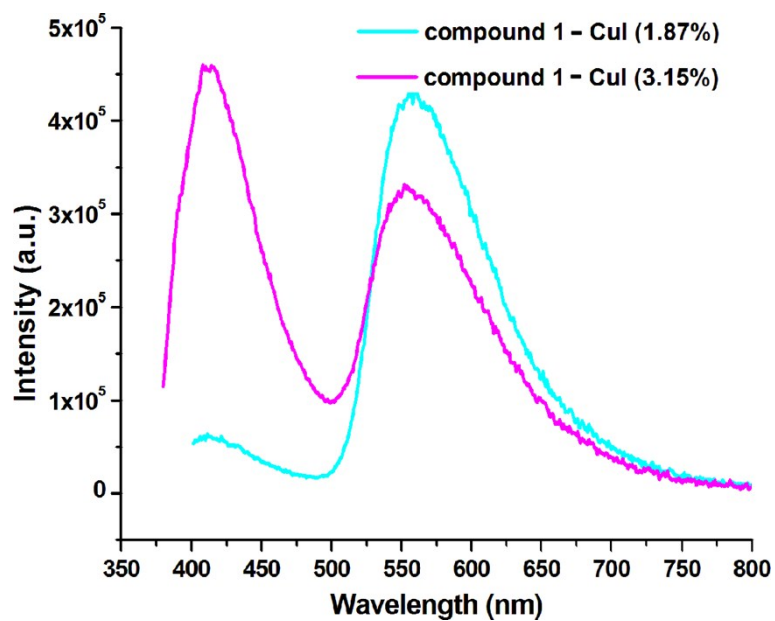

Fig. S8 Solid-state PL spectra of **1-CuI** with different Cu contents monitored at 360 nm.

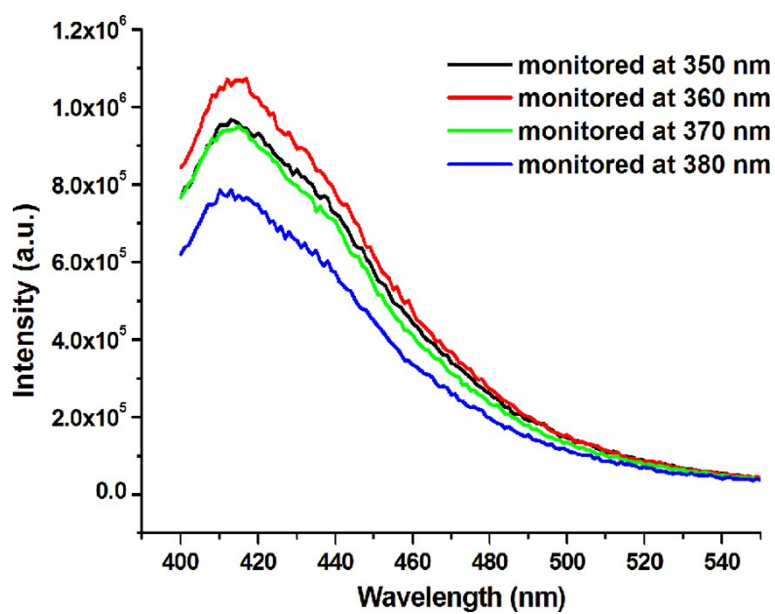

Fig. S9 Solid-state PL spectra of **1** by varying excitation wavelengths.



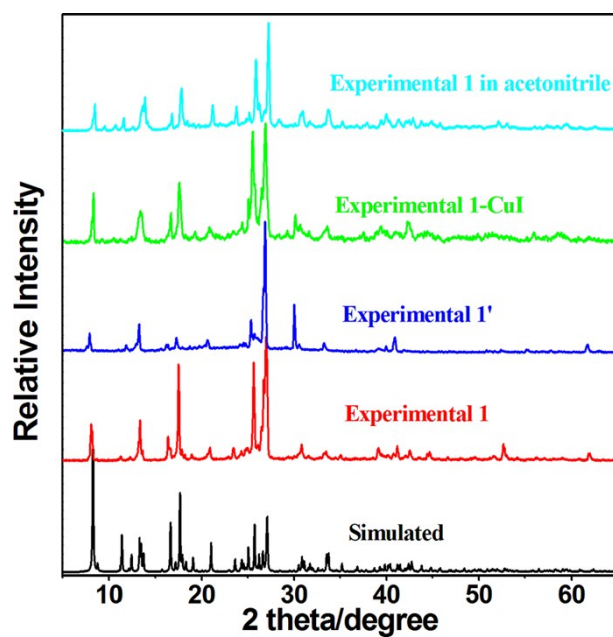

Fig. S10 PXRD patterns of 1, 1', 1-CuI and 1 in acetonitrile at 373K for 24 hours.

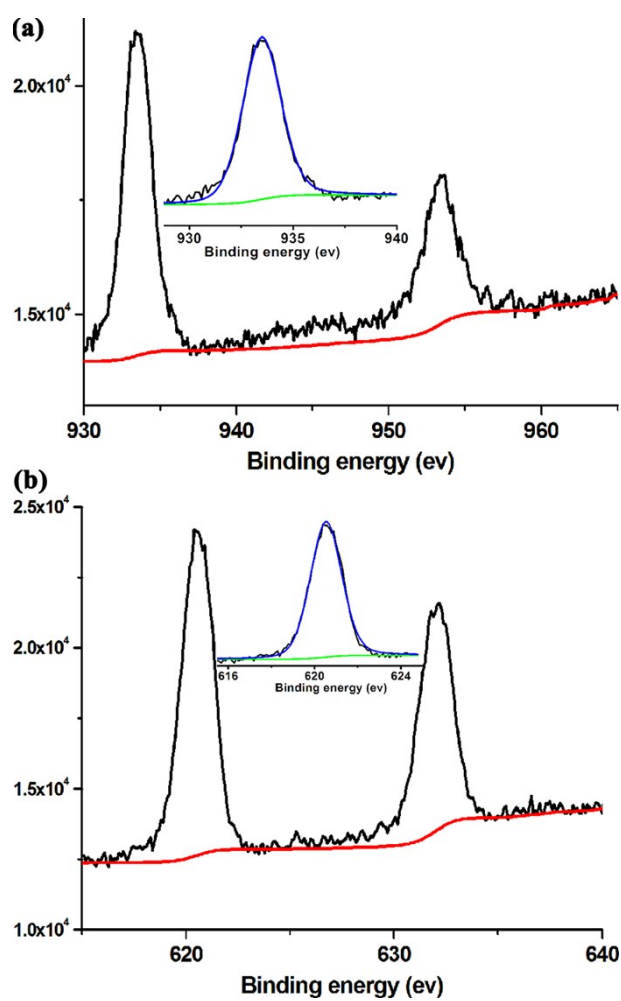

Fig. S11 XPS spectra of the Cu 2p (a) and I 3d (b) region in 1-CuI; the inset is the fitting data of Cu 2p and I 3d.

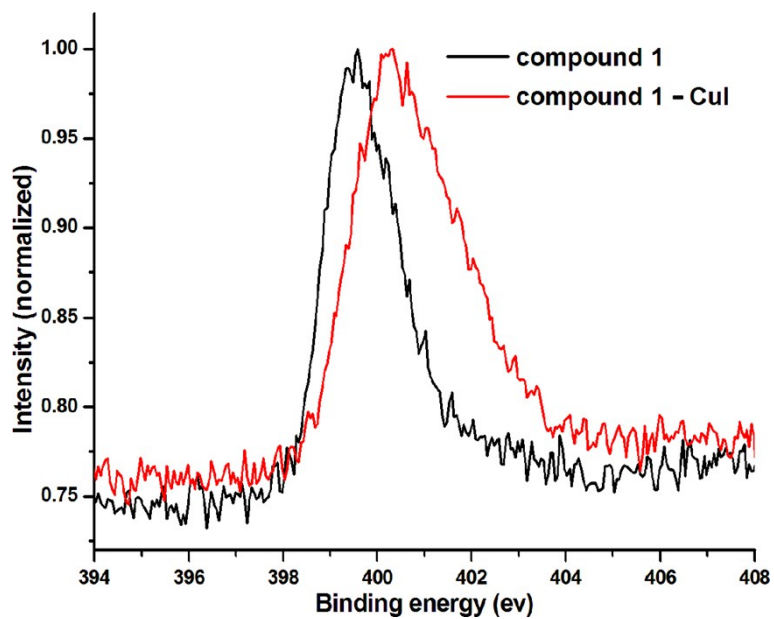

Fig. S12 XPS spectra of the N 1s region for compounds **1** and **1-CuI**.

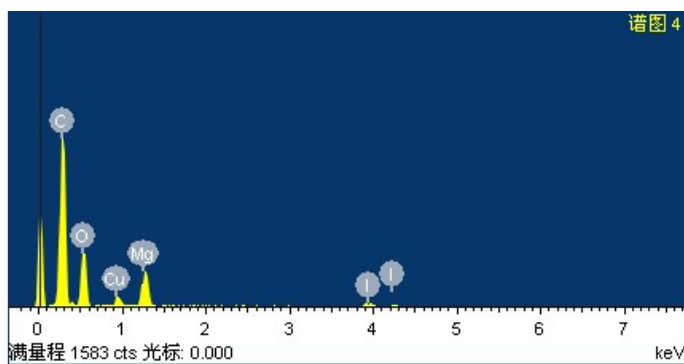

Fig. S13 Energy dispersive spectroscopy (EDS) of **1-CuI**.

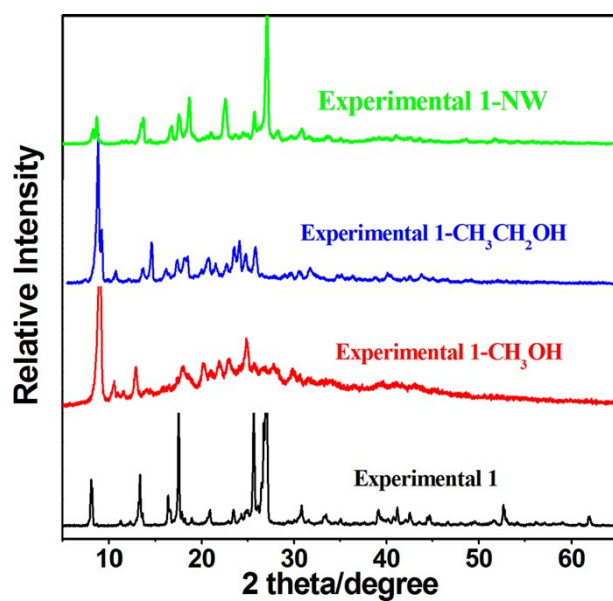

Fig. S14 PXRD patterns of compounds **1**, **1-CH<sub>3</sub>OH**, **1-CH<sub>3</sub>CH<sub>2</sub>OH** and **1-NW**.

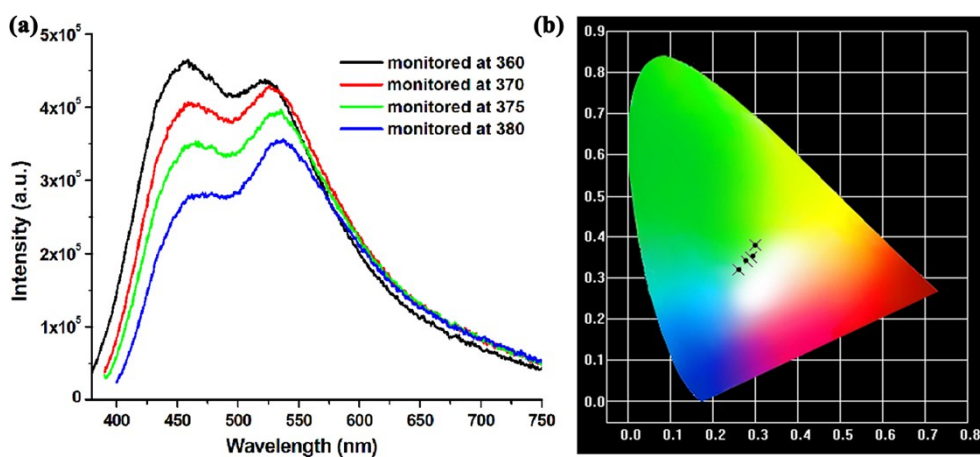

**Fig. S15** Solid-state PL spectra of **1-CuI-NW** by varying excitation lights and the photograph of the CIE chromaticity diagram.

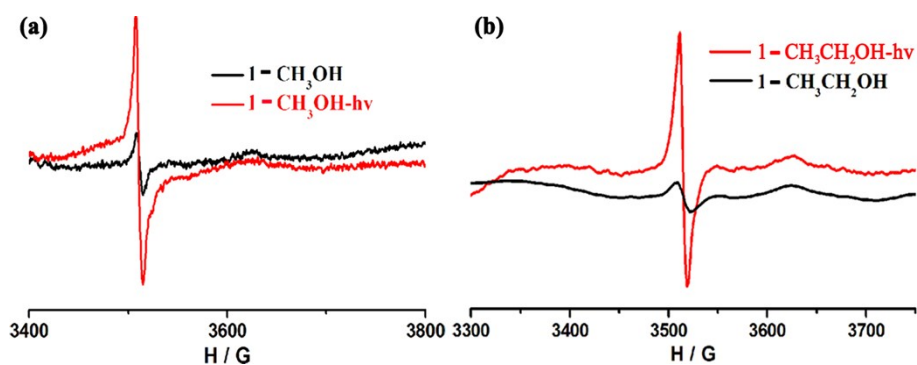

**Fig. S16** The ESR profiles of samples **1-CH<sub>3</sub>OH** and **1-CH<sub>3</sub>CH<sub>2</sub>OH** before and after the irradiation of a Xe lamp.

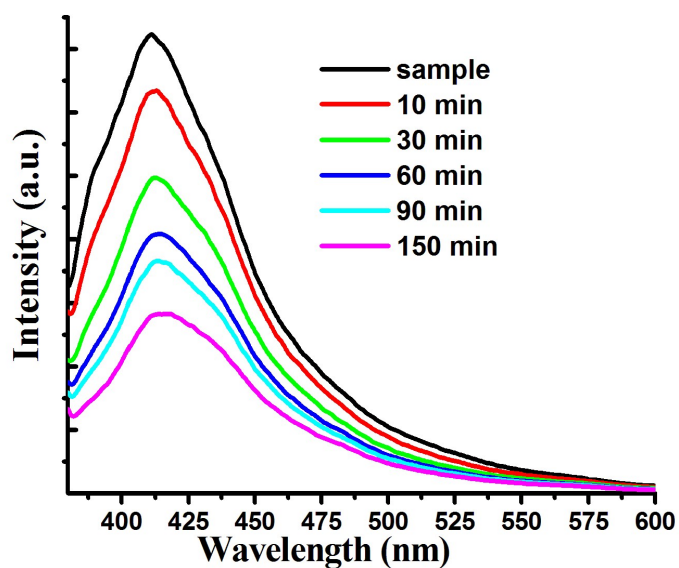

**Fig. S17** The emission profiles of compound **1** under different irradiated time.

## References

1. G. M. Sheldrick, *SHELXS97 and SHELXL97*, University of Göttingen, Germany, **1997**.
2. W. M. Wendlandt, H. G. Hecht, *Reflectance Spectroscopy*, Interscience, New York, **1966**.
